# Supplementary material
Source: PubMed Central journal article supplement (PMC4407221)
Supplement: AEM.00088-15_zam999116234so1.pdf [file AEM.00088-15_zam999116234so1.pdf]

**Figure S1. Samples for SEM.**

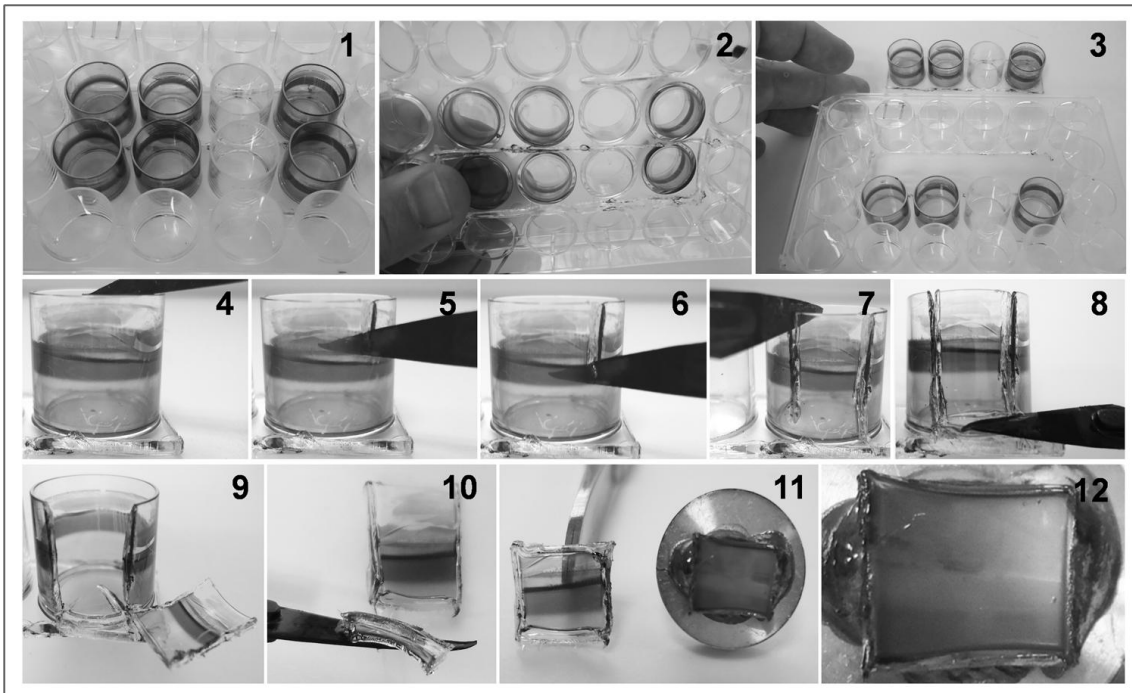

**Figure S1.** Description of how biofilm samples were made for SEM. 1-3, Well separation; 4-10, cutting and selecting a fragment with a hot lancet; 10, Before and after coating with gold. 12, Result before SEM analysis.

**Fig. S2. CLSM.**

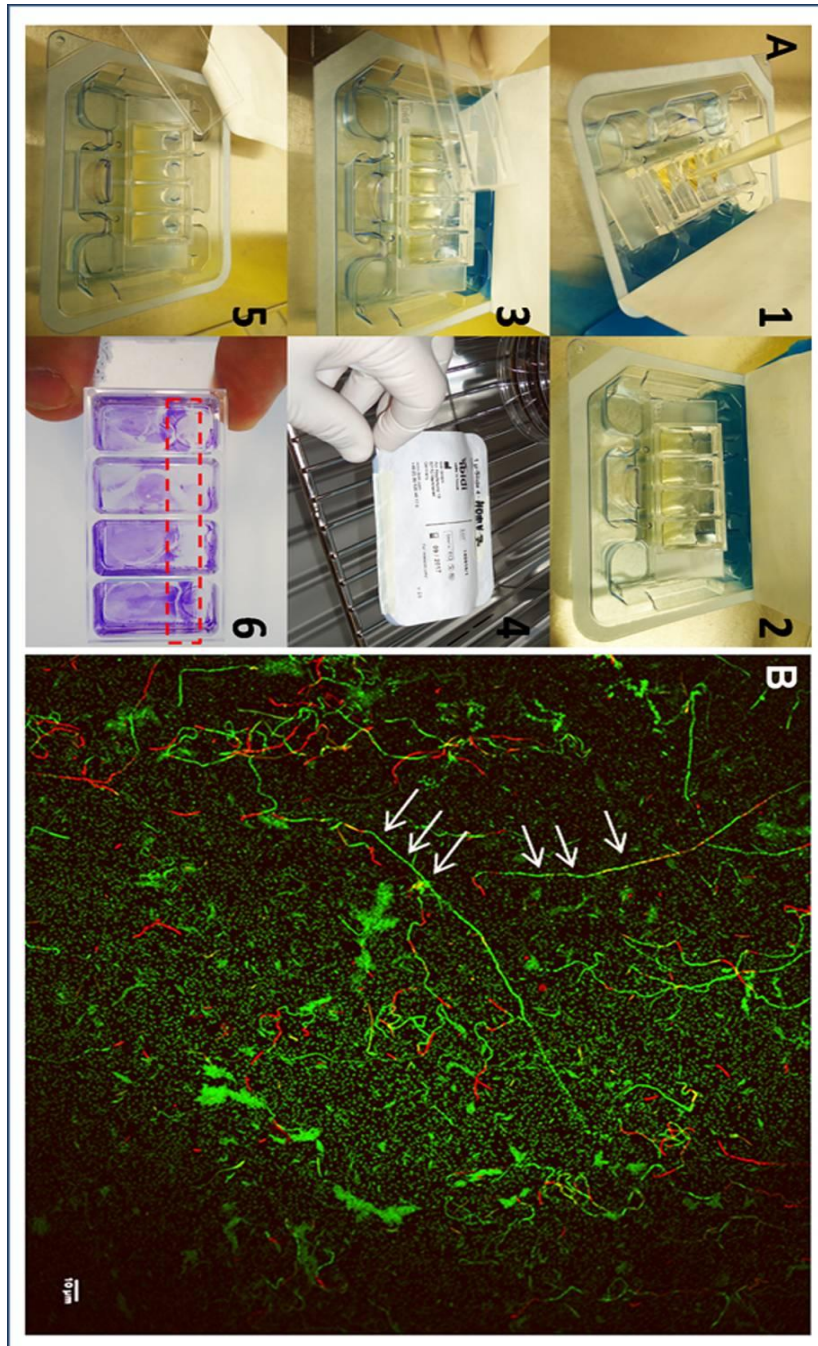

**Figure S2. A,** Description of how biofilm samples were made for confocal imaging. 1-3, Media inoculation; 4, Incubation, slides were placed inclined ( $\sim 45^\circ$ ) into the incubator to form a liquid-air interface; 5, Washing; 6, Examples of staining with CV (same procedure were used for staining with LIVE/DEAD).

**B,** Maximum intensity projection CLSM images of unfixed biofilms formed by *S. liquefaciens* (n°1) and stained with LIVE/DEAD. Live bacteria are stained green and dead bacteria are stained red. Arrows indicate some dividing cells along a bacterial chain. Original magnification  $\times 200$ . Scale bar:  $10\mu\text{m}$ .

**Fig. S3. Bioreporter based detection of AHL production using EPCs.**

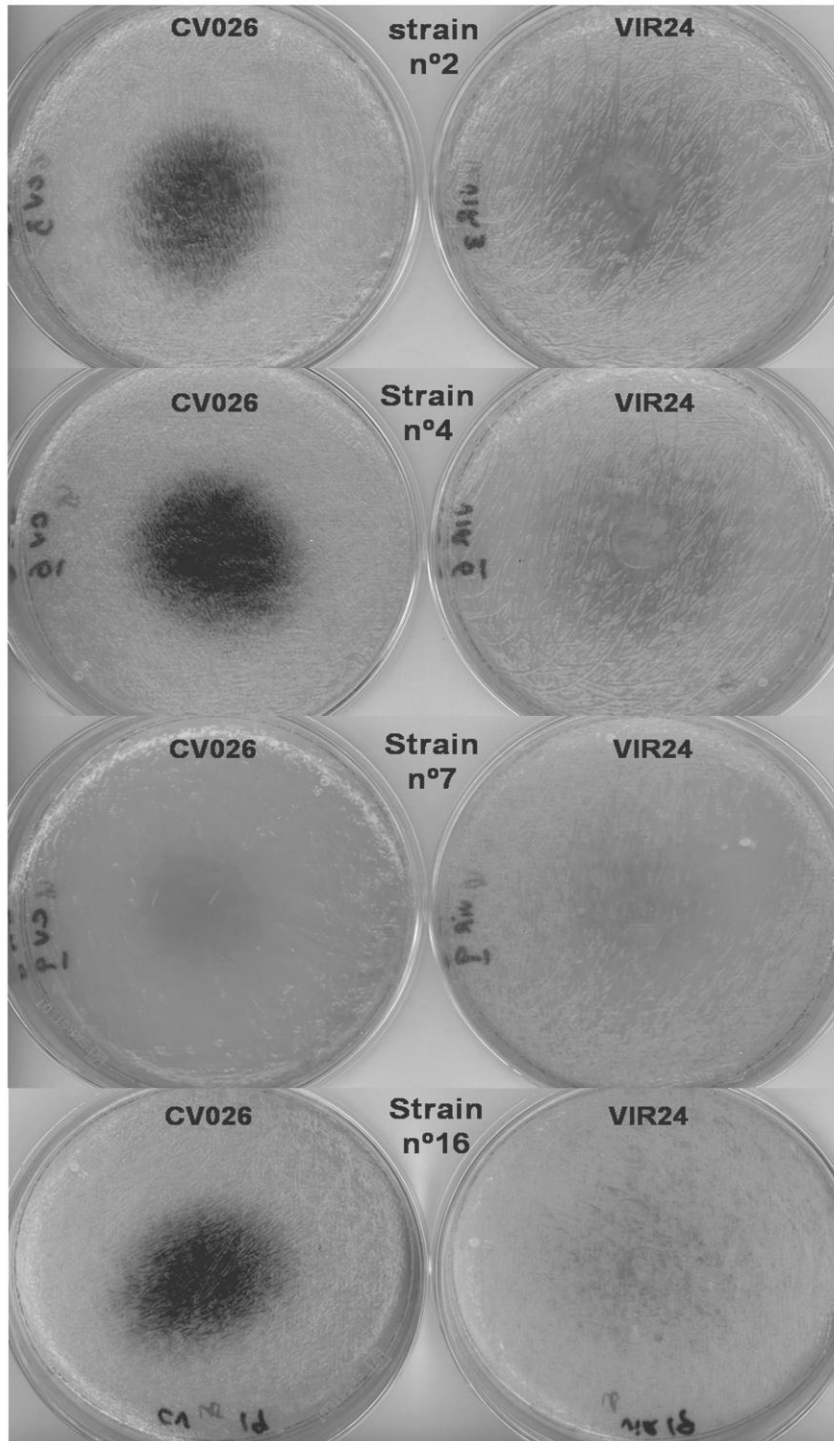

**Figure S3.** Bioreporter based detection of AHL production by *S. liquefaciens* strains. LB agar plates were seeded with 100  $\mu$ l of a suspension of *Chromobacterium violaceum* CV026 or VIR24. The presence of AHLs in ECPs produced by *S. liquefaciens* strains cultured at 37°C was detected after 48 h at 25°C. Development of violet pigment in the reporter strains revealed the production of violacein.

**Fig. S4. Production of AHLs in ECPs at low temperature.**

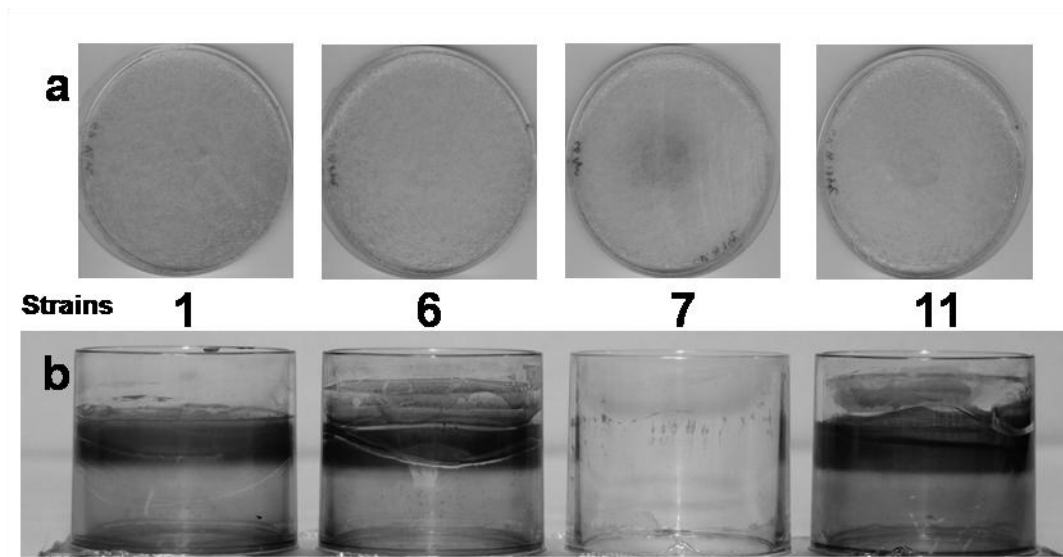

**Figure S4.** Production of AHLs in ECPs and biofilm formation by *S. liquefaciens* strains at low temperature. **a:** strains tested for induction of violacein in *C. violaceum* CV026 using 100 $\mu$ l of ECPs obtained from static cultures at 4°C, during five days, in LB medium. Strain n°7 is positive and strains n°1, n°6 and n°11 are negative. **b:** biofilms formed by different strains in 24 well plates at 4°C, after five days, in LB medium. Biofilms were stained with crystal violet and photographed.

**Fig. S5. (HP)LC-MS.**

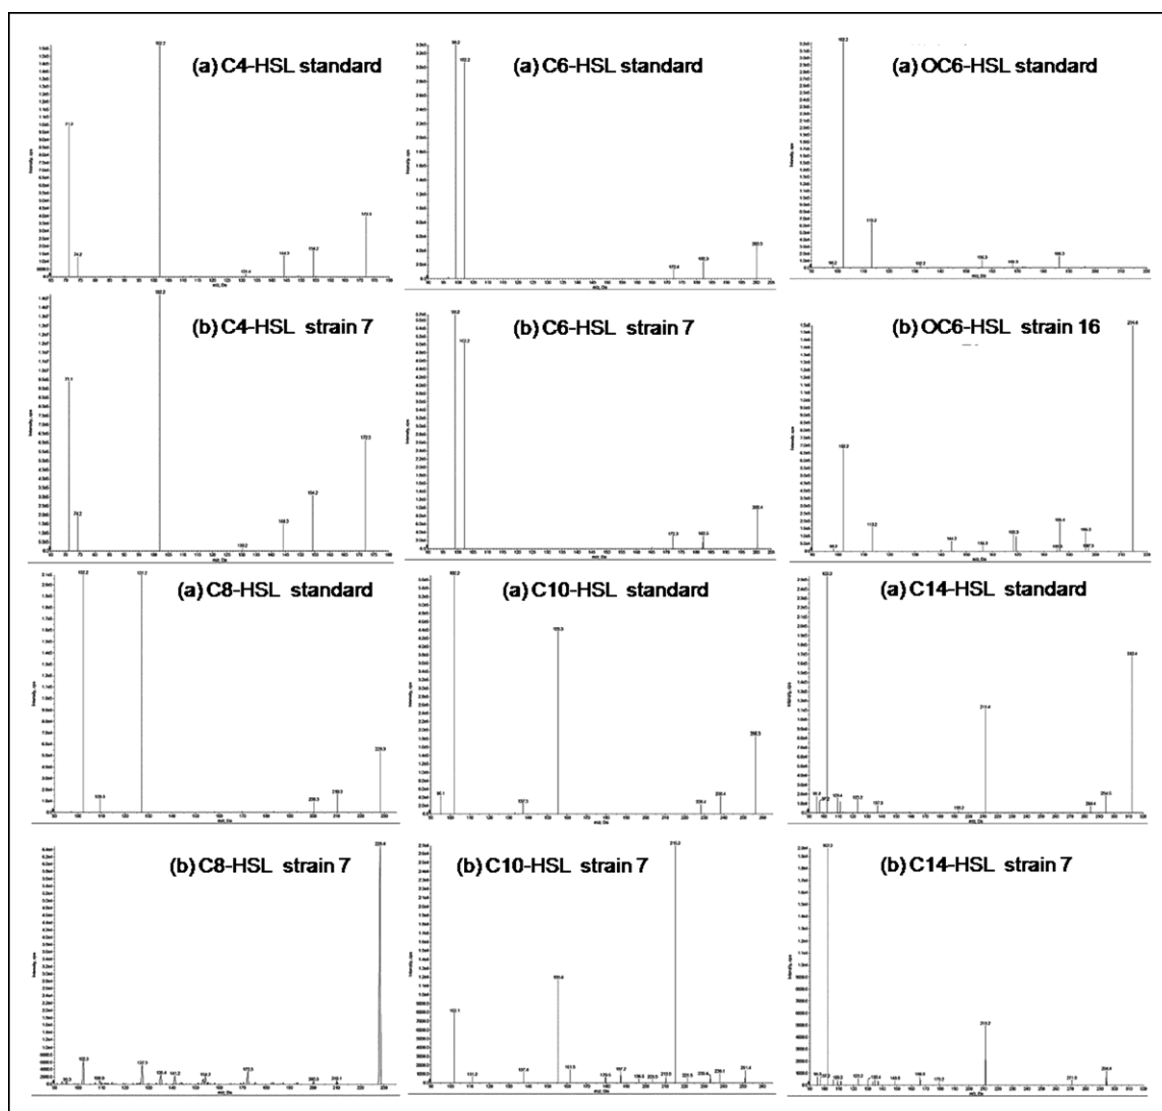

**Figure S5.** Examples of (HP)LC-MS chromatograms in extracts of cell-free supernatants of *S. liquefaciens* as discussed in the text and Table 2. Production spectrum of synthetic C4-HSL, C6-HSL, C8-HSL, C10-HSL and OC6-HSL, and the corresponding peak in the chromatograms of extracts of spent culture medium of strains n°7 and n° 16.

Fig. S6.

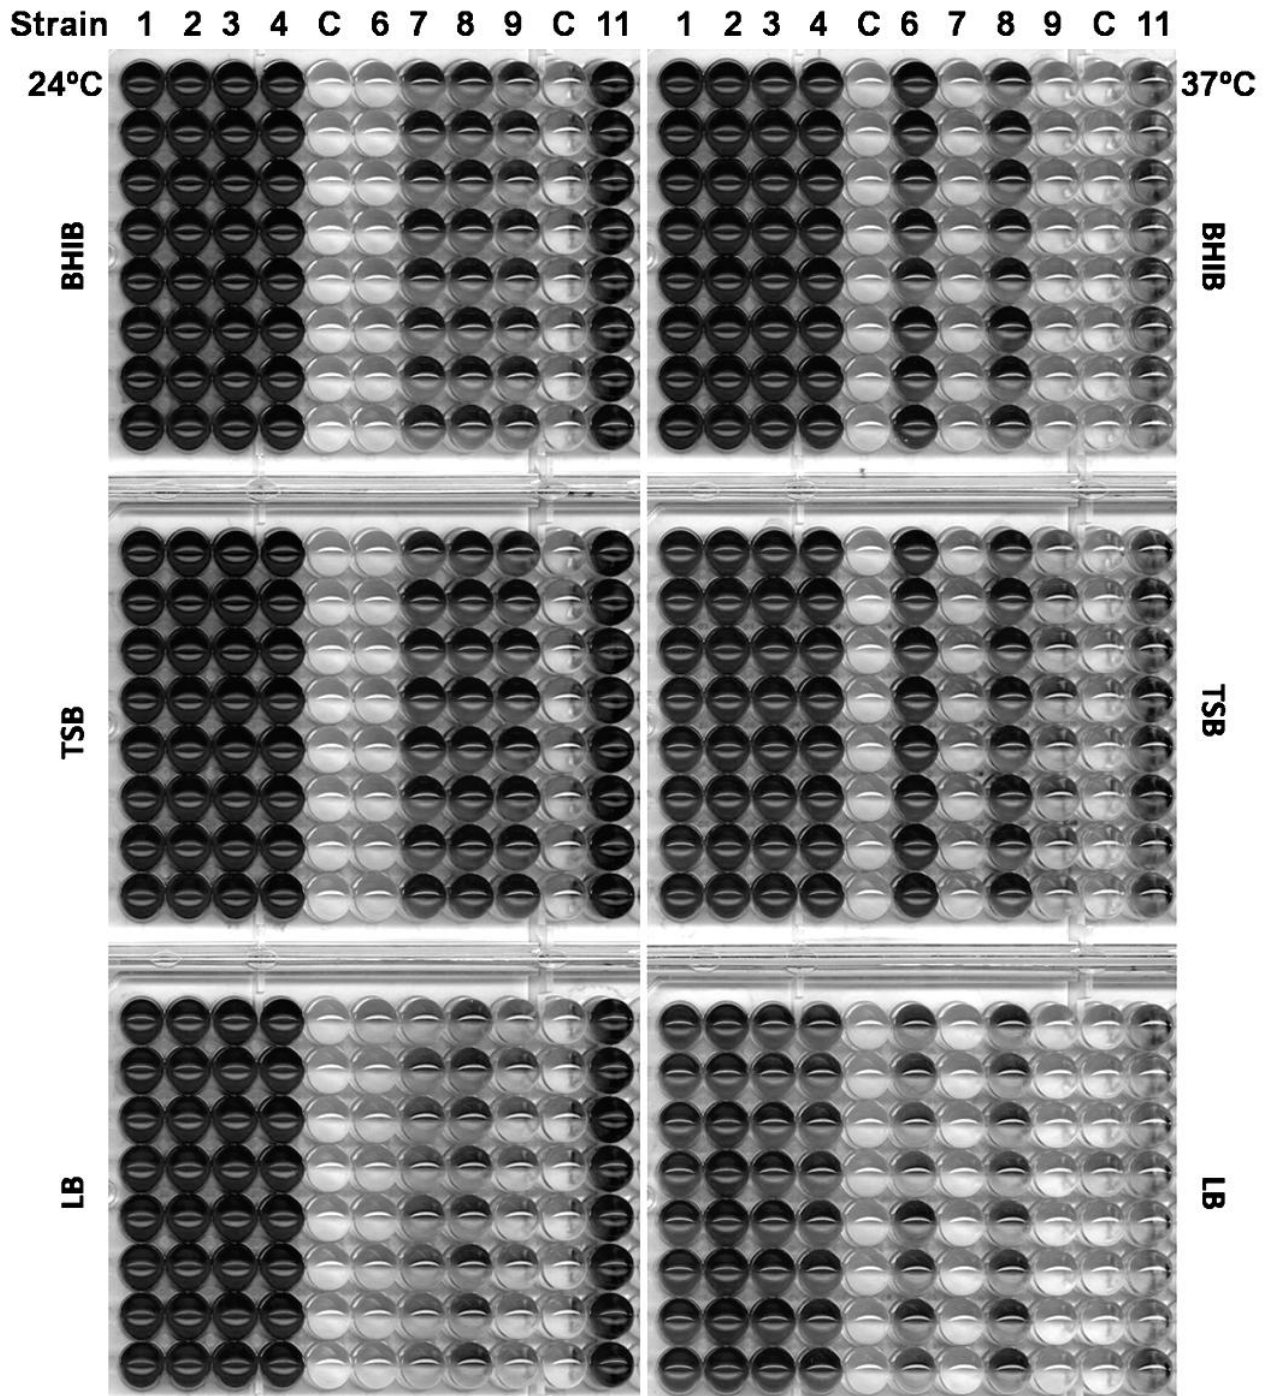

**Figure S6.** Examples of 96-well microtiter plates after CV solubilisation. Representative clinical isolates of *S. liquefaciens* at the indicated temperatures, 24°C (left) and 37°C (right), in three culture media, are shown. Strains are indicated as numbers, as presented in Table 1. c, controls (uninoculated wells).

Fig. S7. Planktonic growth by *S. liquefaciens*

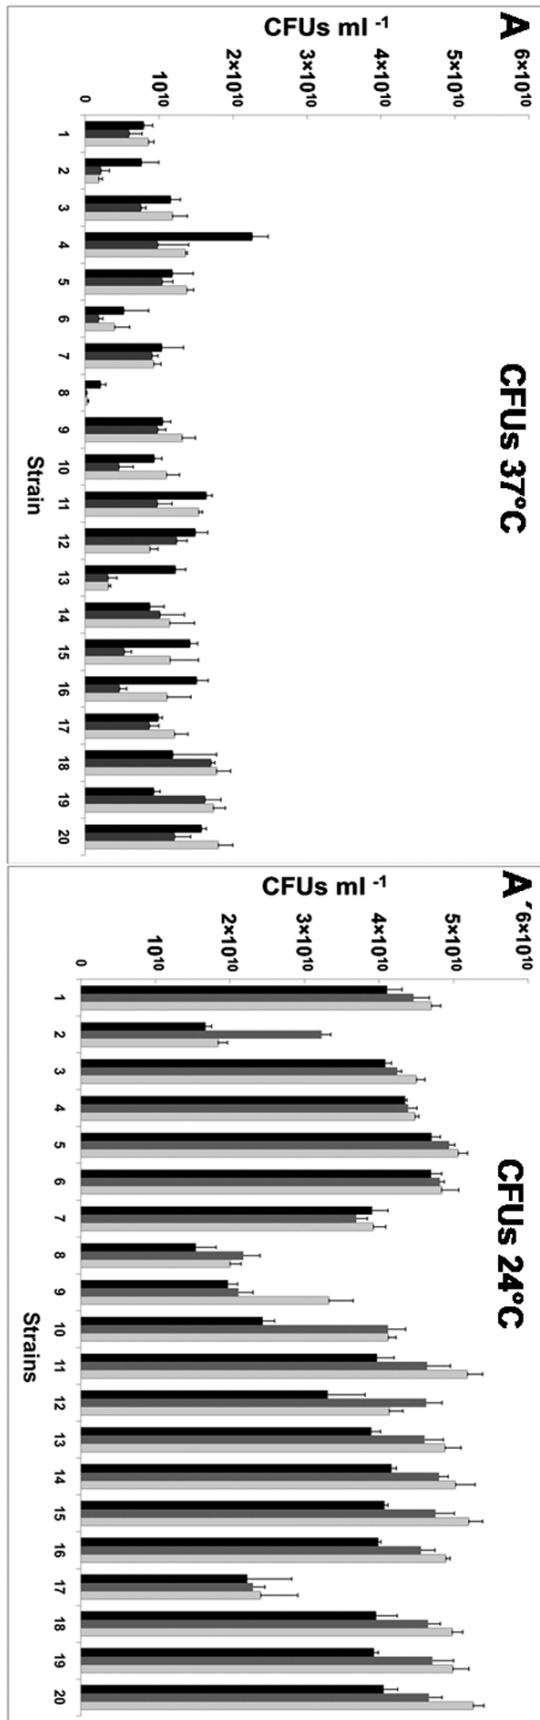

**Figure S7 Planktonic growth in *S. liquefaciens* clinical isolates.**

Quantification of planktonic growth (CFUs). Values are presented as mean  $\pm$  standard deviation (SD) of three independent experiments. Each experiment was carried out in duplicate wells. A, 37°C and B, 24°C, in LB (black bars), TSB (grey bars), and BHIB (white bars). Strains are indicated as numbers, as presented in Table 1 values.



**Figure S8. Mixing experiments using ECPs from AHLs producing strains.**

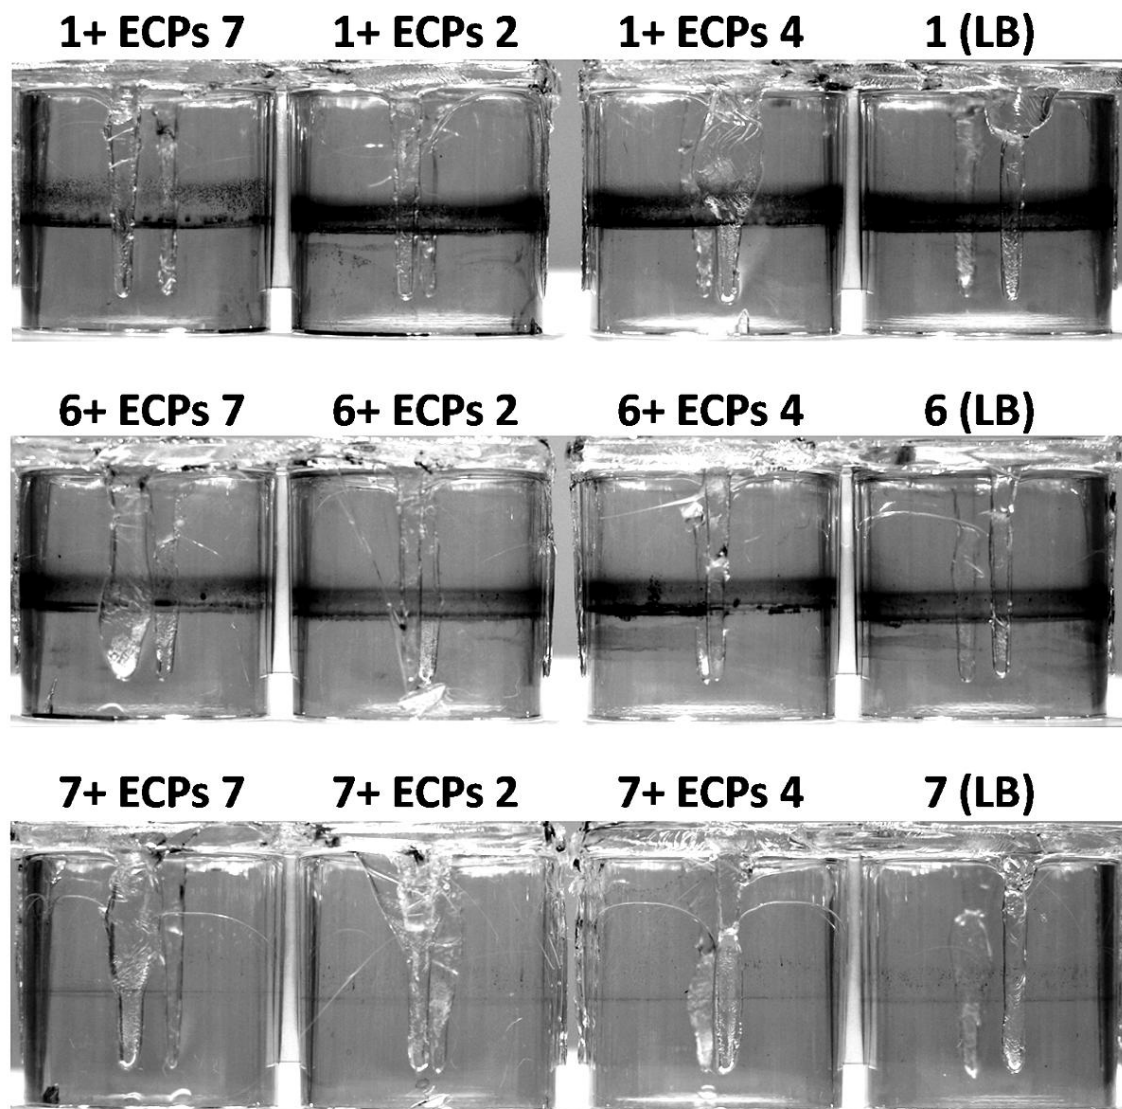

**Figure S8.** Examples of mixing experiments using spent culture media (ECPs) from AHLs-producing strains. Producing strains: n°2, n°4, and n°7. Non-producing strains n°1, and n°6. Example: 1+ ECPs 7 = Strain 1 + ECPs from strain 7. LB, inoculated control without ECPs.
